# Supplementary material for: A 3D human brain–like tissue model of herpes-induced Alzheimer’s disease
Source: PubMed Central journal article supplement — Sci Adv. 2020 May 6;6(19):eaay8828. doi: 10.1126/sciadv.aay8828 (PMC7202879; doi:10.1126/sciadv.aay8828), 2020-05-06
Supplement: aay8828_SM.pdf [file aay8828_SM.pdf]

## Supplementary Materials for

### **A 3D human brain–like tissue model of herpes-induced Alzheimer’s disease**

Dana M. Cairns, Nicolas Rouleau, Rachael N. Parker, Katherine G. Walsh, Lee Gehrke, David L. Kaplan\*

\*Corresponding author. Email: [david.kaplan@tufts.edu](mailto:david.kaplan@tufts.edu)

Published 6 May 2020, *Sci. Adv.* **6**, eaay8828 (2020)  
DOI: [10.1126/sciadv.aay8828](https://doi.org/10.1126/sciadv.aay8828)

#### **This PDF file includes:**

Tables S1 to S3  
Figs. S1 to S4

## Supplemental Data

**Table S1.** Table of qRT-PCR primer sequences.

| GENE                                             | ACCESSION #        | SEQUENCE 1 (5'-->3')        | SEQUENCE 2 (5'-->3')     |
|--------------------------------------------------|--------------------|-----------------------------|--------------------------|
| Amyloid precursor protein (APP)                  | NM_000484          | GTCTCTCTCCCTGCTCTACAA       | GGCCAAGACGTCATCTGAATAG   |
| Beta secretase 1 (BACE1)                         | NM_012104          | CCATCCTTCCGCAGCAATA         | CGTAGAAGCCCTCCATGATAAC   |
| Tumor necrosis factor alpha (TNF $\alpha$ )      | NM_000594.4        | GAGGCCAAGCCCTGGTATG         | CGGGCCGATTGATCTCAGC      |
| Serpina3n (SERP3)                                | NM_001085.4        | GCTCATCAACGACTACGTGA<br>A   | CACCATTACCCACTTTTTTCTTGC |
| Lipocalin 2 (LCN2)                               | NM_005564.5        | GACAACCAATTCCAGGGGAA<br>G   | GCATACATCTTTTGCGGGTCT    |
| Presenilin 1 (PSEN1)                             | NM_000021          | TGGCTACCATTAAGTCAGTCA<br>GC | CCCACAGTCTCGGTATCTTCT    |
| Presenilin 2 (PSEN2)                             | NM_012486          | CTGACCGCTATGTCTGTAGT<br>GG  | CTTCGCTCCGTATTTGAGGGT    |
| Interleukin 6 (IL-6)                             | NM_012486          | TCAATATTAGAGTCTCAACCC<br>CC | TTGTTTTCTGCCAGTGCCTC     |
| Interleukin 1 beta (IL1 $\beta$ )                | NM_000576.2        | CAGAAGTACCTGAGCTCGCC        | AGATTCGTAGCTGGATGCCG     |
| Interferon gamma (IFN $\gamma$ )                 | NM_000619          | ACTGTCGCCAGCAGCTAAAA        | TATTGCAGGCAGGACAACCA     |
| Vimentin (VIM)                                   | NM_003380.5        | TCCGCACATTTCGAGCAAAGA       | TGATTCAAGTCTCAGCGGGC     |
| Glyceraldehyde 3-phosphate dehydrogenase (GAPDH) | NM_002046.5        | ATTGCCCTCAACGACCACT         | ATGAGGTCCACCACCCTGT      |
| Glial fibrillary acidic protein (GFAP)           | NM_001131019.<br>2 | ACTGGCAGAGCTTGTTAGTG        | AGTGACAGGAAGAGGTGAGA     |
| Human alpha-herpesvirus 1 strain MacIntyre       | MN136523.1         | TGGCTTTTCGGACTACACCC        | TTCGAAGGCCGTGAACGTAA     |

**Table S2.** Table of antibodies used for immunostaining.

| <b>HOST</b>                 | <b>ANTIGEN</b>                              | <b>VENDOR</b>             | <b>CATALOG #</b> |
|-----------------------------|---------------------------------------------|---------------------------|------------------|
| Mouse                       | HSV Type1/2 gB                              | Thermofisher              | MA1-19265        |
| Rabbit                      | HSV-1                                       | Abcam                     | ab9533           |
| Rabbit                      | Beta III tubulin (TUJ1)                     | Abcam                     | ab18207          |
| Mouse                       | Beta III tubulin (TUJ1)                     | Sigma                     | T8578            |
| Rabbit                      | Cleaved Caspase 3 (CC3)                     | RND                       | AF835            |
| Rabbit                      | Amyloid Fibril                              | Abcam                     | ab201062         |
| Mouse                       | Phospho-Tau (Ser202, Thr205) (AT8)          | Thermofisher              | MN1020           |
| Mouse                       | Microtubule-associated protein tau (Tau-1)  | Sigma                     | MAB3420          |
| Mouse                       | Glial fibrillary acidic protein (GFAP)      | Sigma                     | G3893            |
| Rabbit                      | Glial fibrillary acidic protein (GFAP)      | Sigma                     | G9269            |
| Rabbit                      | Tumor necrosis factor alpha (TNF $\alpha$ ) | Cell Signaling Technology | 8184S            |
| Goat (Alexa 488 conjugated) | Rabbit IgG                                  | Thermofisher              | A-11070          |
| Goat (Alexa 594 conjugated) | Rabbit IgG                                  | Thermofisher              | A-11072          |
| Goat (Alexa 488 conjugated) | Mouse IgG                                   | Thermofisher              | A-11017          |
| Goat (Alexa 594 conjugated) | Mouse IgG                                   | Thermofisher              | A-11020          |

**Table S3.** Genes upregulated in response to HSV-1 infection in 3D human brain-like tissue constructs using the Qiagen RT Profiler Array for Alzheimer's Disease.

| <b>SYMBOL</b> | <b>GENE NAME</b>                                                                         | <b>ACCESSION #</b> | <b>FOLD UPREGULATION</b> |
|---------------|------------------------------------------------------------------------------------------|--------------------|--------------------------|
| CTSG          | Cathepsin G                                                                              | NM_001911          | 86.18                    |
| MPO           | Myeloperoxidase                                                                          | NM_000250          | 42.32                    |
| PRKCQ         | Protein kinase C, theta                                                                  | NM_006257          | 33.80                    |
| IL1A          | Interleukin 1, alpha                                                                     | NM_000575          | 31.45                    |
| CASP4         | Caspase 4, apoptosis-related cysteine peptidase                                          | NM_001225          | 28.94                    |
| SERP3         | Serpin peptidase inhibitor, clade A (alpha-1 antitrypsin), member 3                      | NM_001085          | 28.77                    |
| CHAT          | Choline O-acetyltransferase                                                              | NM_020985          | 28.29                    |
| PLAU          | Plasminogen activator, urokinase                                                         | NM_002658          | 27.38                    |
| GNGT2         | Guanine nucleotide binding protein (G protein), gamma transducing activity polypeptide 2 | NM_031498          | 22.98                    |
| INS           | Insulin                                                                                  | NM_000207          | 19.45                    |
| BACE2         | Beta-site APP-cleaving enzyme 2                                                          | NM_012105          | 19.03                    |
| GNGT1         | Guanine nucleotide binding protein (G protein), gamma transducing activity polypeptide 1 | NM_021955          | 17.63                    |
| PLG           | Plasminogen                                                                              | NM_000301          | 15.68                    |
| APOA1         | Apolipoprotein A-I                                                                       | NM_000039          | 15.49                    |
| ERN1          | Endoplasmic reticulum to nucleus signaling 1                                             | NM_001433          | 12.13                    |
| APBA3         | Amyloid beta (A4) precursor protein-binding, family A, member 3                          | NM_004886          | 10.91                    |
| CDKL1         | Cyclin-dependent kinase-like 1 (CDC2-related kinase)                                     | NM_004196          | 10.74                    |
| PRKCI         | Protein kinase C, iota                                                                   | NM_002740          | 9.89                     |
| GNG11         | Guanine nucleotide binding protein (G protein), gamma 11                                 | NM_004126          | 8.61                     |
| NTRK1         | Neurotrophic tyrosine kinase, receptor, type 1                                           | NM_002529          | 7.33                     |
| BDNF          | Brain-derived neurotrophic factor                                                        | NM_001709          | 6.44                     |
| INSR          | Insulin receptor                                                                         | NM_000208          | 6.05                     |
| GSK3B         | Glycogen synthase kinase 3 beta                                                          | NM_002093          | 5.55                     |
| SNCB          | Synuclein, beta                                                                          | NM_003085          | 5.37                     |
| ACHE          | Acetylcholinesterase                                                                     | NM_000665          | 4.25                     |
| LRP6          | Low density lipoprotein receptor-related protein 6                                       | NM_002336          | 3.44                     |
| UBQLN1        | Ubiquilin 1                                                                              | NM_013438          | 3.26                     |
| A2M           | Alpha-2-macroglobulin                                                                    | NM_000014          | 2.96                     |
| HPRT1         | Hypoxanthine phosphoribosyltransferase 1                                                 | NM_000194          | 2.90                     |
| GNB5          | Guanine nucleotide binding protein (G protein), beta 5                                   | NM_016194          | 2.78                     |
| PRKCE         | Protein kinase C, epsilon                                                                | NM_005400          | 2.71                     |
| PKP4          | Plakophilin 4                                                                            | NM_003628          | 2.52                     |
| PRKCD         | Protein kinase C, delta                                                                  | NM_006254          | 2.47                     |
| PRKCZ         | Protein kinase C, zeta                                                                   | NM_002744          | 2.42                     |
| PSEN2         | Presenilin 2 (Alzheimer disease 4)                                                       | NM_000447          | 2.37                     |
| PRKCG         | Protein kinase C, gamma                                                                  | NM_002739          | 2.23                     |
| IDE           | Insulin-degrading enzyme                                                                 | NM_004969          | 2.21                     |
| UQCRC2        | Ubiquinol-cytochrome c reductase core protein II                                         | NM_003366          | 2.17                     |
| PRKCA         | Protein kinase C, alpha                                                                  | NM_002737          | 2.15                     |
| BCHE          | Butyrylcholinesterase                                                                    | NM_000055          | 2.07                     |

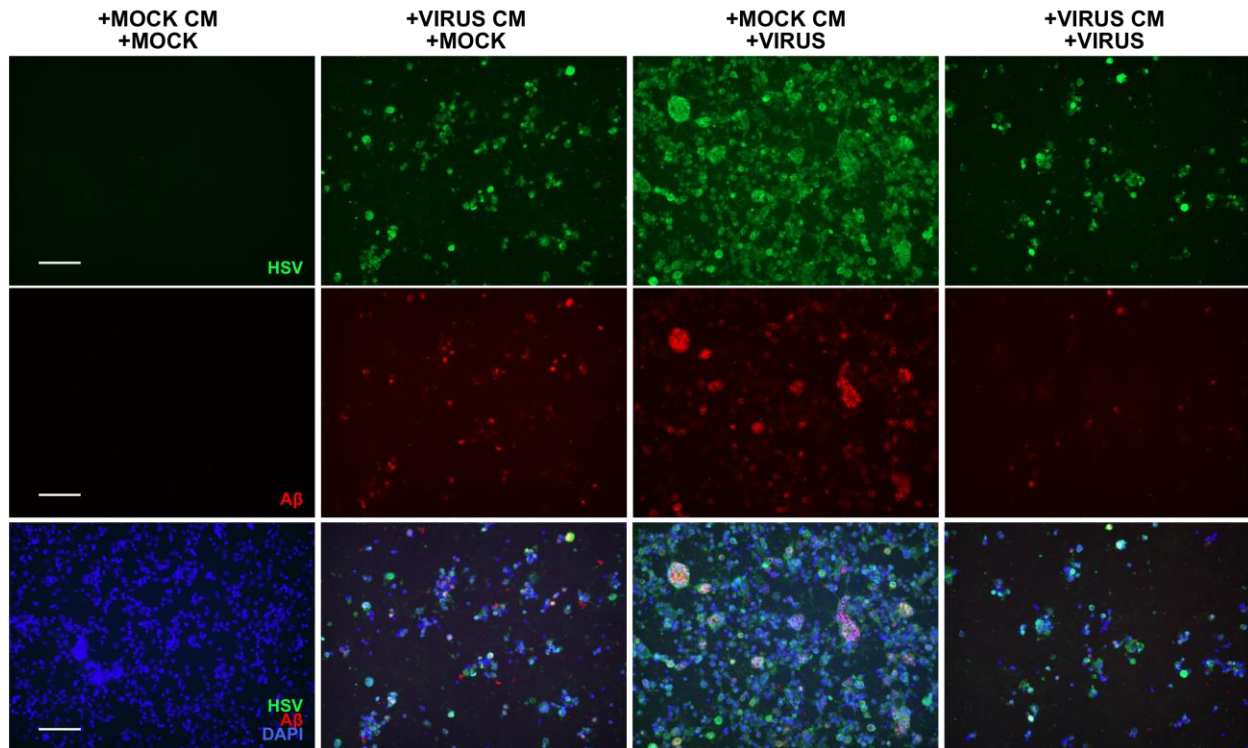

**Figure S1. HSV-1-infected hiNSCs secrete HSV-1 that can infect new cells.** Conditioned media (CM) was harvested and filtered from mock or HSV-1 infected hiNSCs that had been cultured for 2 days. Mock or fresh HSV-1 virus was added to CM and new hiNSCs were cultured for 4 days. Antibodies against HSV or beta amyloid fibrils (A $\beta$ ) were used to immunostain cells. virus CM can infect new cells suggesting that infected hiNSCs secrete HSV-1. Scale bar = 100 $\mu$ m.

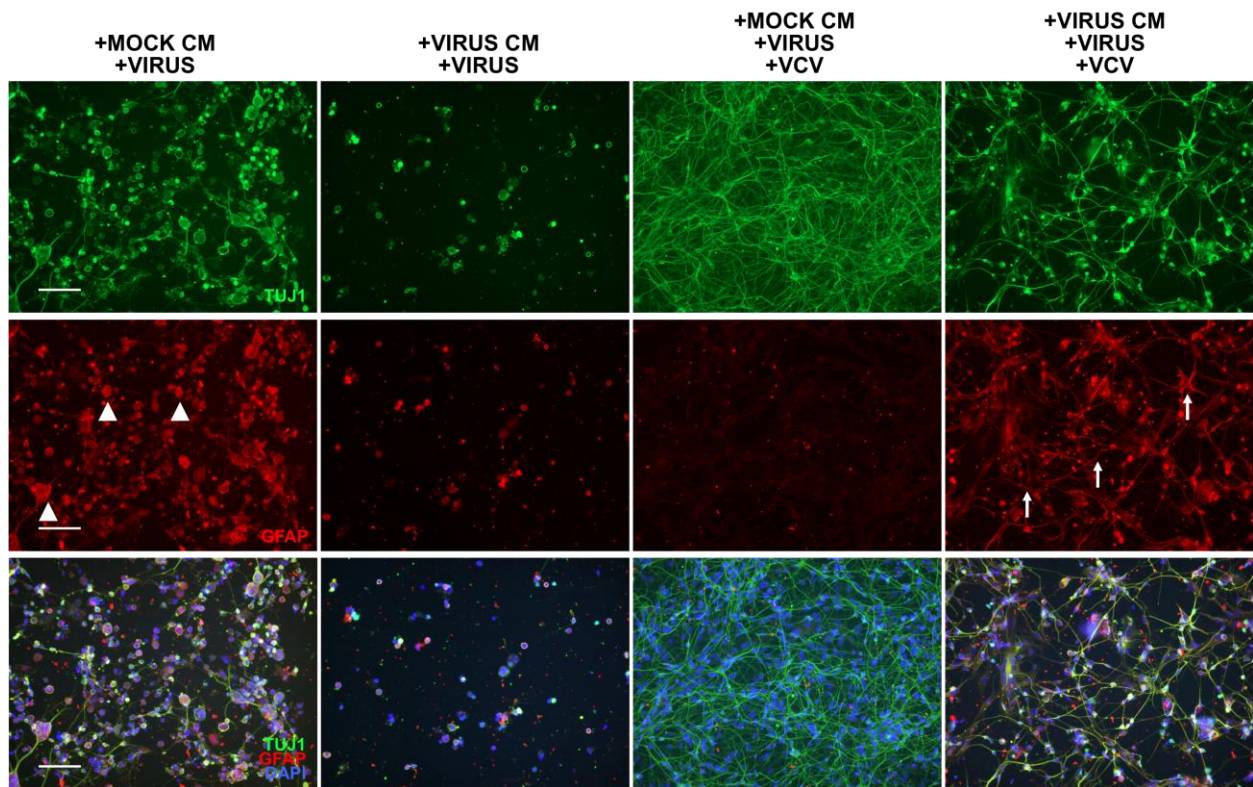

**Figure S2. HSV-1-secreted factors cause gliosis even in the absence of infection.**

Conditioned media (CM) was harvested and filtered from mock or HSV-1 infected hiNSCs that had been cultured for 2 days. Fresh HSV-1 virus was added to CM in the absence of presence of antiviral treatment Valacyclovir HCl (VCV) and new hiNSCs were cultured for 4 days. Beta III tubulin (TUJ1) and glial fibrillary acidic protein (GFAP) immunostaining was performed to visualize neurons and glia, respectively. Preventing HSV-1 infection using VCV in virus CM results in increased reactive glia formation suggesting that HSV-1 induced factors play a role in astrogliosis. Arrowheads = swollen activated reactive glia; arrows = intermediate reactive glia with more fibrous extensions. Scale bar = 100 $\mu$ m.

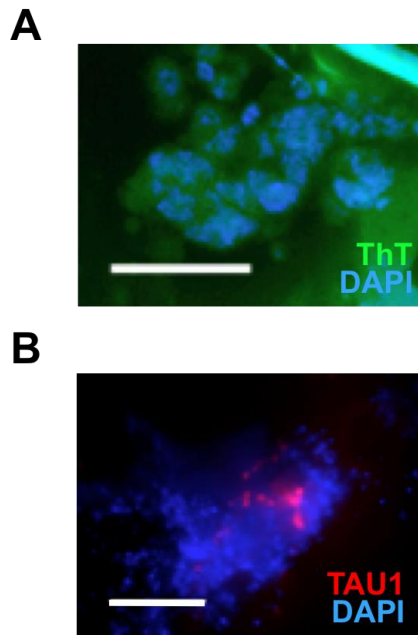

**Figure S3. hiNSCs cultured in 3D human brain model then subjected to low level HSV-1 infection develop AD-like plaque formations.** High magnification confocal images reveal positive Thioflavin T (ThT) (A) and TAU1 expression in plaque-like formations (PLFs) in HSV-1-infected 3D brain cultures. Scale bar = 100 $\mu$ m.

|          |       |       |        |       |       |       |       |       |        |       |       |
|----------|-------|-------|--------|-------|-------|-------|-------|-------|--------|-------|-------|
| A2M      | ABCA1 | ACHE  | ADAM10 | ADAM9 | APBA1 | APBA3 | APBB1 | APBB2 | APH1A  | APLP1 | APLP2 |
| APOA1    | APOE  | APP   | BACE1  | BACE2 | BCHE  | BDNF  | CAPN1 | CASP3 | CASP4  | CDK1  | CDK5  |
| CDKL1    | CHAT  | CLU   | CTSB   | CTSC  | CTSD  | CTSG  | CTSL  | EP300 | ERN1   | GAP43 | GNAO1 |
| GNAZ     | GNB1  | GNB2  | GNB4   | GNB5  | GNG11 | GNG3  | GNG4  | GNGT1 | GNGT2  | GSK3A | GSK3B |
| HSD17B10 | IDE   | IL1A  | INS    | INSR  | LPL   | LRP1  | LRP6  | LRP8  | MAP2   | MAPT  | MPO   |
| NAE1     | NCSTN | NTRK1 | NTRK2  | PKP4  | PLAT  | PLAU  | PLG   | PRKCA | PRKCB  | PRKCD | PRKCE |
| PRKCG    | PRKCI | PRKCQ | PRKCZ  | PSEN1 | PSEN2 | SERP3 | SNCA  | SNCB  | UBQLN1 | UQCR1 | UQCR2 |

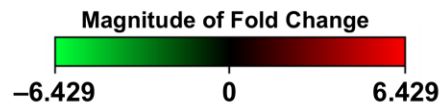

**Figure S4. HSV-1 infected 3D human brain-like tissue constructs overexpress multiple AD-related factors.** Heat map to visually portray relative expression levels of different genes in mock and virus-infected 3D human brain-like tissue cultures using the Qiagen RT Profiler Array for Alzheimer's Disease. Red-green color spectrum represents relative fold change of virus-infected samples as compared to mock-controls.
